# Supplementary material for: Identify Bitter Peptides by Using Deep Representation Learning Features
Source: MDPI journal article supplement (doi:10.3390/ijms23147877), 2022-07-17
Supplement: s1 [file s1]

## Supplemental table legends:

**Supplemental Table S1.** Performance metrics of the UniRep+BiLSTM feature analyzed by different models using hyperparameters and default parameters. Results using selected hyperparameters invariably matched or outperformed default ones.

|                  | Model (parameters)                            | Dim | ACC                             | MCC                 | Sn                  | Sp                  | F1                  | auPRC               | auROC               |
|------------------|-----------------------------------------------|-----|---------------------------------|---------------------|---------------------|---------------------|---------------------|---------------------|---------------------|
| 10-fold CV       | SVM <sup>b</sup> (C=1.00, g=0.01)             | 186 | 0.850                           | 0.702               | 0.840               | 0.860               | 0.848               | 0.922               | 0.922               |
|                  | SVM <sup>b</sup> (C=2.44, g=0.0035)           | 186 | 0.873                           | 0.746               | 0.887               | 0.859               | 0.875               | 0.932               | 0.934               |
|                  | LGBM <sup>b</sup> (depth=8, n_estimators=120) | 106 | 0.871                           | 0.746               | 0.863               | 0.879               | 0.870               | <b><u>0.955</u></b> | <b><u>0.952</u></b> |
|                  | LGBM <sup>b</sup> (depth=3, n_estimators= 75) | 106 | <b><u>0.889<sup>a</sup></u></b> | <b><u>0.777</u></b> | <b><u>0.891</u></b> | <b><u>0.887</u></b> | <b><u>0.889</u></b> | 0.947               | <b><u>0.952</u></b> |
|                  | RF <sup>b</sup> (Nleaf=1, n_estimators=120)   | 45  | 0.858                           | 0.717               | 0.859               | 0.856               | 0.857               | 0.942               | 0.943               |
|                  | RF <sup>b</sup> (Nleaf=2, n_estimators=300)   | 45  | 0.871                           | 0.742               | 0.871               | 0.871               | 0.871               | 0.937               | 0.941               |
| Independent test | SVM <sup>b</sup> (C=1.00, g=0.01)             | 186 | 0.906                           | 0.813               | 0.906               | 0.906               | 0.906               | 0.963               | 0.965               |
|                  | SVM <sup>b</sup> (C=2.44, g=0.0035)           | 186 | 0.914                           | 0.829               | 0.937               | 0.891               | 0.916               | 0.961               | 0.965               |
|                  | LGBM <sup>b</sup> (depth=8, n_estimators=120) | 106 | 0.883                           | 0.766               | 0.875               | 0.891               | 0.882               | 0.960               | 0.962               |
|                  | LGBM <sup>b</sup> (depth=3, n_estimators= 75) | 106 | <b><u>0.944</u></b>             | <b><u>0.889</u></b> | 0.922               | <b><u>0.977</u></b> | <b><u>0.952</u></b> | <b><u>0.984</u></b> | <b><u>0.977</u></b> |
|                  | RF <sup>b</sup> (Nleaf=1, n_estimators=120)   | 45  | 0.901                           | 0.802               | 0.914               | 0.887               | 0.930               | 0.973               | 0.964               |
|                  | RF <sup>b</sup> (Nleaf=2, n_estimators=300)   | 45  | 0.938                           | 0.875               | <b><u>0.938</u></b> | 0.938               | 0.938               | 0.976               | 0.971               |

<sup>a</sup>Best performance values are in bold and are underlined.

<sup>b</sup>SVM: support vector machine; LGBM: light gradient boosting machine; RF: random forest.
